# Supplementary material
Source: publisher site journal article supplement (https://www.spandidos-publications.com/3302/downloadSupplementary)

Figure S1. Effects of MFR and vitexin on osteoclast differentiation. (A) RANKL-induced osteoclasts were stained using a TRAP kit. Magnification,  $\times 100$ ; scale bar,  $200\ \mu\text{m}$ . (B) TRAP levels were measured using an enzyme-linked immunosorbent assay reader. (C) Expression levels of NFATc1 and c-Fos were determined by western blotting. The black line is displayed to group the western blot images. (D) Protein expression levels of NFATc1 and c-Fos were normalized to  $\beta$ -actin. (E) Cytotoxicity was measured by MTS assay. Data were analyzed using one-way ANOVA followed by Tukey's post hoc test. <sup>a</sup> $P < 0.05$  vs. normal group (untreated cells); <sup>b</sup> $P < 0.05$  vs. RANKL treatment group; <sup>c</sup> $P < 0.05$  vs. MFR  $50\ \mu\text{g/ml}$  treatment group; <sup>d</sup> $P < 0.05$  vs. MFR  $100\ \mu\text{g/ml}$  treatment group; MFR, *Melandrium firmum* Rohrbach; RANKL, receptor activator of nuclear factor- $\kappa\text{B}$  ligand; TRAP, tartrate-resistant acid phosphatase; NFATc1, nuclear factor of activated T-cells.

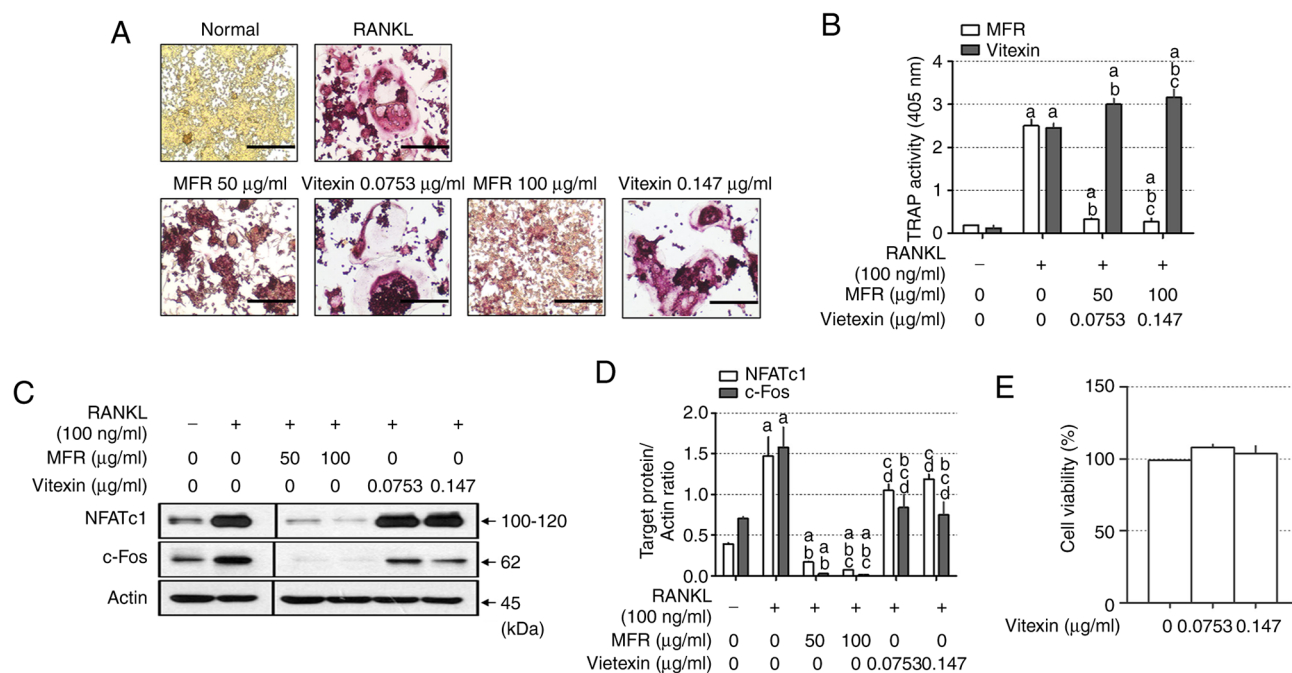

Supplement: Supplementary file 1 [file downloadSupplementary]
